# Supplementary material
Source: PubMed Central journal article supplement (PMC7279958)
Supplement: EMS85894-supplement-Supplementary_Tables.pdf [file EMS85894-supplement-Supplementary_Tables.pdf]

**Supplemental Table 1.** *Saccharomyces cerevisiae* strains used in this study.

| <b>Strain</b> | <b>Relevant genotype</b>                                                                                                         | <b>Figure</b>                                                     |
|---------------|----------------------------------------------------------------------------------------------------------------------------------|-------------------------------------------------------------------|
| AMy1105       | <i>MATa cdc20::URA3::pMET-CDC20 SCC1-6HA</i>                                                                                     | 1a, c, 2a, b, c, d, 3a, Extended Data Fig. 1b, 3, 4a, 5b, 6a, 10a |
| AMy1145       | <i>MATa SCC1-6HA</i>                                                                                                             | Extended Data Fig. 9d, e                                          |
| AMy2508       | <i>MATa, cdc20::URA3::pMET-CDC20</i>                                                                                             | 2a, b, e, 3d, 4e, Extended Data Fig. 6a, b, 7, 8a, b, c, 10e      |
| AMy3950       | <i>MATa cdc20::URA3::pMET-CDC20 SCC1-6HA chl4Δ::KanMX6</i>                                                                       | 1b, c, 2c, d, Extended Data Fig. 1b                               |
| AMy6389       | <i>MATa cdc20::URA3::pMET-CDC20 SGO1-6HA::TRP1</i>                                                                               | Extended Data Fig. 4a, b, c, d, e, f                              |
| AMy6471       | <i>MATa, cdc20::URA3::pMET-CDC20 Spc42-tdTomato::NAT his3::PURA3::tetR-GFP::HIS3 ~1kbR_CEN3::tetOx224::URA3</i>                  | 1d, Extended Data Fig. 5c                                         |
| AMy6884       | <i>MATa cdc20::URA3::pMET-CDC20 sgo1(Y47A;Q50A;S52A)::hphMX4</i>                                                                 | Extended Data Fig. 8a, b                                          |
| AMy7217       | <i>MATa cdc20::URA3::pMET-CDC20 sgo1Δ::KanMX6</i>                                                                                | Extended Data Fig. 8a, b                                          |
| AMy8955       | <i>MATa cdc20::URA3::pMET-CDC20 BRN1-6HA::TRP1</i>                                                                               | Extended Data Fig. 4a, b, c, d                                    |
| AMy14126      | <i>MATa, cdc20::URA3::pMET-CDC20 his3::PURA3::tetR-GFP::HIS3 SCC1-6HA::TRP1 SCC2-6HIS-3xFLAG::KAN ~1kbR_CEN3::tetOx224::URA3</i> | Extended Data Fig. 9a                                             |
| AMy16144      | <i>MATa cdc20::URA3::pMET-CDC20 CEN3Δ::LEU2 CEN6-URA3::CHRIII ~260kb SCC1-6HA</i>                                                | Extended Data Fig. 3                                              |

| <b>Strain</b> | <b>Relevant genotype</b>                                                                                                                                                                                                                     | <b>Figure</b>              |
|---------------|----------------------------------------------------------------------------------------------------------------------------------------------------------------------------------------------------------------------------------------------|----------------------------|
| AMy16541      | <i>MATa SCC1-6HA PTC1-pURA3-URA3-MED2</i>                                                                                                                                                                                                    | Extended Data Fig. 9d, e   |
| AMy16721      | <i>MATa SCC1-6HA MED2-pURA3-URA3-PTC1</i>                                                                                                                                                                                                    | Extended Data Fig. 9d, e   |
| AMy22078      | <i>MATa cdc20::URA3::pMET-CDC20 SCC1-6HA pMAF1-MAF1::loxp (reversed orientation) pPTC1-PTC1::loxp (reversed orientation) pRPT2-RPT2::loxp (reversed orientation) pSOK1-SOK1-loxp-KANMX-loxp (reversed orientation)</i>                       | 3a, Extended Data Fig. 10a |
| AMy22900      | <i>MATa, cdc20::URA3::pMET-CDC20 Spc42-tdTomato::NAT leu2::tetR-GFP::LEU2 ~7kbR_CEN3::tetOx224::URA3</i>                                                                                                                                     | 1d, Extended Data Fig. 5c  |
| AMy22936      | <i>MATa cdc20::URA3::pMET-CDC20 Spc42-tdTomato::NAT leu2::tetR-GFP::LEU2 ~3kbR_CEN3::tetOx224::URA3</i>                                                                                                                                      | 1d, Extended Data Fig. 5c  |
| AMy23081      | <i>MATa, cdc20::URA3::pMET-CDC20 Spc42-tdTomato::NAT leu2::tetR-GFP::LEU2 ~3kbR_CEN1::tetOx224::URA3</i>                                                                                                                                     | 1d, Extended Data Fig. 5c  |
| AMy23082      | <i>MATa, cdc20::URA3::pMET-CDC20 Spc42-tdTomato::NAT leu2::tetR-GFP::LEU2 ~1kbR_CEN1::tetOx224::URA3</i>                                                                                                                                     | 1d, Extended Data Fig. 5c  |
| AMy23125      | <i>MATa, cdc20::URA3::pMET-CDC20 Spc42-tdTomato::NAT leu2::tetR-GFP::LEU2~7kbR_CEN1::tetOx224::URA3</i>                                                                                                                                      | 1d, Extended Data Fig. 5c  |
| AMy23185      | <i>MATa, cdc20::URA3::pMET-CDC20 Spc42-tdTomato::NAT leu2::tetR-GFP::LEU2 ~18kbR_CEN3::tetOx224::URA3</i>                                                                                                                                    | 1d, Extended Data Fig. 5c  |
| AMy25236      | <i>MATa, cdc20::URA3::pMET-CDC20 Spc42-tdTomato::NAT leu2::tetR-GFP::LEU2 ~23kbR_CEN3::tetOx224::URA3</i>                                                                                                                                    | 1d, Extended Data Fig. 5c  |
| AMy25297      | <i>MATa, cdc20::URA3::pMET-CDC20 Spc42-tdTomato::NAT leu2::tetR-GFP::LEU2 ~8kbR_CEN1::tetOx224::URA3</i>                                                                                                                                     | 1d, Extended Data Fig. 5c  |
| AMy25298      | <i>MATa cdc20::URA3::pMET-CDC20 SCC1-6HA pMAF1-MAF1::loxp (reversed orientation) pPTC1-PTC1::loxp (reversed orientation) pRPT2-RPT2::loxp (reversed orientation) pSOK1-SOK1-loxp-KANMX-loxp (reversed orientation) SGO1-6HIS-3FLAG::URA3</i> | Extended Data Fig. 10a     |

| <b>Strain</b> | <b>Relevant genotype</b>                                                                                                                                                                                                                                                              | <b>Figure</b>                          |
|---------------|---------------------------------------------------------------------------------------------------------------------------------------------------------------------------------------------------------------------------------------------------------------------------------------|----------------------------------------|
| AMy25299      | <i>MATa cdc20::URA3::pMET-CDC20 SCC1-6HA pMAF1-MAF1::loxp (reversed orientation) pPTC1-PTC1::loxp (reversed orientation) pRPT2-RPT2::loxp (reversed orientation) pSOK1-SOK1-loxp-KANMX-loxp (reversed orientation) BRN1-6HIS-3FLAG::NATMX6</i>                                        | Extended Data Fig. 10a                 |
| AMy25379      | <i>MATa cdc20::URA3::pMET-CDC20 SCC1-6HA BRN1-6HIS-3FLAG::NATMX6</i>                                                                                                                                                                                                                  | Extended Data Fig. 10a                 |
| AMy25409      | <i>MATa cdc20::URA3::pMET-CDC20 SCC1-6HA SGO1-6HIS-3FLAG::URA3</i>                                                                                                                                                                                                                    | Extended Data Fig. 10a                 |
| AMy25764      | <i>MATa, cdc20::URA3::pMET-CDC20 Spc42-tdTomato::NAT leu2::tetR-GFP::LEU2 ~21kbR_CEN3::tetOx224::URA3</i>                                                                                                                                                                             | 1d, Extended Data Fig. 5c              |
| AMy26822      | <i>MATa, cdc20::URA3::pMET-CDC20 chl4Δ::KanMX6</i>                                                                                                                                                                                                                                    | 2c, d, e, Extended Data Fig. 6a, 7, 8c |
| AMy26964      | <i>MATa, cdc20::URA3::pMET-CDC20 Spc42-tdTomato::NAT leu2::tetR-GFP::LEU2 ~12kbR_CEN1::tetOx224::URA3</i>                                                                                                                                                                             | 1d, Extended Data Fig. 5c              |
| AMy26965      | <i>MATa, cdc20::URA3::pMET-CDC20 Spc42-tdTomato::NAT leu2::tetR-GFP::LEU2 ~12kbR_CEN3::tetOx224::URA3</i>                                                                                                                                                                             | 1d, Extended Data Fig. 5c              |
| AMy26966      | <i>MATa, cdc20::URA3::pMET-CDC20 SCC1-6HA rad61Δ::TRP1</i>                                                                                                                                                                                                                            | Extended Data Fig. 1a                  |
| AMy27213      | <i>MATa, cdc20::URA3::pMET-CDC20 Spc42-tdTomato::NAT leu2::tetR-GFP::LEU2 ~4kbR_CEN4::tetOx224::URA3</i>                                                                                                                                                                              | 3b, 4a, 4b, Extended Data Fig. 10b, c  |
| AMy27214      | <i>MATa, cdc20::URA3::pMET-CDC20 Spc42-tdTomato::NAT leu2::tetR-GFP::LEU2 ~11.5kbR_CEN4::tetOx224::URA3</i>                                                                                                                                                                           | 3b, 5a, Extended Data Fig. 10b, c      |
| AMy27215      | <i>MATa, cdc20::URA3::pMET-CDC20 Spc42-tdTomato::NAT leu2::tetR-GFP::LEU2 pMAF1-MAF1::loxp (reversed orientation) pPTC1-PTC1::loxp (reversed orientation) pRPT2-RPT2::loxp (reversed orientation) pSOK1-SOK1-loxp-KANMX-loxp (reversed orientation) ~13.5kbR_CEN4::tetOx224::URA3</i> | 3b, 5a, Extended Data Fig. 10b, c      |
| AMy27216      | <i>MATa, cdc20::URA3::pMET-CDC20 Spc42-tdTomato::NAT leu2::tetR-GFP::LEU2 pMAF1-MAF1::loxp (reversed orientation) pPTC1-PTC1::loxp</i>                                                                                                                                                | 3b, 4a, 4b, Extended                   |

| <b>Strain</b> | <b>Relevant genotype</b>                                                                                                                                                                                                                                                                                                                     | <b>Figure</b>                 |
|---------------|----------------------------------------------------------------------------------------------------------------------------------------------------------------------------------------------------------------------------------------------------------------------------------------------------------------------------------------------|-------------------------------|
|               | <i>(reversed orientation) pRPT2-RPT2::loxp (reversed orientation) pSOK1-SOK1-loxp-KANMX-loxp (reversed orientation) ~4kbR_CEN4::tetOx224::URA3</i>                                                                                                                                                                                           | Data Fig. 10b, c              |
| AMy27936      | <i>MATa, cdc20::URA3::pMET-CDC20 PMAF1-MAF1::loxp (in opposite orientation) PPTC1-PTC1::loxp (reversed orientation) PRPT2-RPT2::loxp (reversed orientation) PSOK1-SOK1-loxp-KANMX-loxp (reversed orientation)</i>                                                                                                                            | 3d, Extended Data Fig. 10d, e |
| AMy28477      | <i>MATa, cdc20::URA3::pMET-CDC20 Spc42-tdTomato::NAT leu2::PURA3::tetR-GFP::LEU2 tetOx224-URA3 (tetOs ~23kb to right of CEN4)</i>                                                                                                                                                                                                            | Extended Data Fig. 10c        |
| AMy28478      | <i>MATa, cdc20::URA3::pMET-CDC20 Spc42-tdTomato::NAT leu2::PURA3::tetR-GFP::LEU2 tetOx224-URA3 (tetOs ~23kb to right of CEN4) MCD1-6HA PMAF1-MAF1::loxp (in opposite orientation) PPTC1-PTC1::loxp (reversed orientation) PRPT2-RPT2::loxp (reversed orientation) PSOK1-SOK1-loxp-KANMX-loxp (reversed orientation)</i>                      | Extended Data Fig. 10c        |
| AMy28726      | <i>MATa cdc20::URA3::pMET-CDC20 Spc42-tdTomato::NAT leu2::PURA3::tetR-GFP::LEU2 tetOx224-URA3 (tetOs ~0.5kb to right of CEN3. INSIDE the boundary) MCD1-6HA PMAF1-MAF1::loxp (in opposite orientation) PPTC1-PTC1::loxp (reversed orientation) PRPT2-RPT2::loxp (reversed orientation) PSOK1-SOK1-loxp-KANMX-loxp (reversed orientation)</i> | 4b                            |
| AMy28787      | <i>MATa ipl1-321 Spc42-tdTomato::NAT leu2::PURA3::tetR-GFP::LEU2 tetOx224-URA3 (tetOs ~4kb to right of CEN4)</i>                                                                                                                                                                                                                             | 4c, 4d                        |
| AMy28788      | <i>MATa Spc42-tdTomato::NAT leu2::PURA3::tetR-GFP::LEU2 tetOx224-URA3 (tetOs ~4kb to right of CEN4)</i>                                                                                                                                                                                                                                      | 4c, 4d                        |
| AMy28790      | <i>MATa ipl1-321 MCD1-6HA Spc42-tdTomato::NAT PMAF1-MAF1::loxp (in opposite orientation) PPTC1-PTC1::loxp (reversed orientation) PRPT2-RPT2::loxp (reversed orientation) PSOK1-SOK1-loxp-KANMX-loxp (reversed orientation) leu2::PURA3::tetR-GFP::LEU2 tetOx224-URA3 (tetOs ~4kb to right of CEN4)</i>                                       | 4c, 4d                        |
| AMy28791      | <i>MATa MCD1-6HA Spc42-tdTomato::NAT PMAF1-MAF1::loxp (in opposite orientation) PPTC1-PTC1::loxp (reversed orientation) PRPT2-RPT2::loxp (reversed orientation) PSOK1-SOK1-loxp-KANMX-loxp</i>                                                                                                                                               | 4c, 4d                        |

| <b>Strain</b> | <b>Relevant genotype</b>                                                                                                                                                                                                                                                                                                                                                                                                                                                                                           | <b>Figure</b> |
|---------------|--------------------------------------------------------------------------------------------------------------------------------------------------------------------------------------------------------------------------------------------------------------------------------------------------------------------------------------------------------------------------------------------------------------------------------------------------------------------------------------------------------------------|---------------|
|               | <i>(reversed orientation) leu2::PURA3::tetR-GFP::LEU2 tetOx224-URA3 (tetOs ~4kb to right of CEN4)</i>                                                                                                                                                                                                                                                                                                                                                                                                              |               |
| AMy28792      | <i>MET-CDC20::URA3 Spc42-tdTomato::NAT leu2::PURA3::tetR-GFP::LEU2 tetOx224-URA3 (tetOs ~4kb to right of CEN4) pURA3::ABIx2-V5::TRP1 (between RAD57 and MAF1 at chr IV RIGHT border, transcribed away from CEN4) pURA3::PYLx2-3FLAG::HisMX6 (between PTC1 and MED2 at chr IV LEFT border, transcribed away from CEN4)</i>                                                                                                                                                                                          | 3c            |
| AMy28793      | <i>MET-CDC20::URA3 Spc42-tdTomato::NAT leu2::PURA3::tetR-GFP::LEU2 tetOx224-URA3 (tetOs ~11.5kb to right of CEN4) pURA3::ABIx2-V5::TRP1 (between RAD57 and MAF1 at chr IV RIGHT border, transcribed away from CEN4) pURA3::PYLx2-3FLAG::HisMX6 (between PTC1 and MED2 at chr IV LEFT border, transcribed away from CEN4)</i>                                                                                                                                                                                       | 3c            |
| AMy28794      | <i>MCD1-6HA MET-CDC20::URA3 Spc42-tdTomato::NAT PMAF1-MAF1::loxp (in opposite orientation) PPTC1-PTC1::loxp (reversed orientation) PRPT2-RPT2::loxp (reversed orientation) PSOK1-SOK1-loxp-KANMX-loxp (reversed orientation) leu2::PURA3::tetR-GFP::LEU2 tetOx224-URA3 (tetOs ~4kb to right of CEN4) pURA3::ABIx2-V5::TRP1 (between RAD57 and MAF1 at chr IV RIGHT border, transcribed away from CEN4) pURA3::PYLx2-3FLAG::HisMX6 (between PTC1 and MED2 at chr IV LEFT border, transcribed away from CEN4)</i>    | 3c            |
| AMy28878      | <i>MCD1-6HA MET-CDC20::URA3 Spc42-tdTomato::NAT PMAF1-MAF1::loxp (in opposite orientation) PPTC1-PTC1::loxp (reversed orientation) PRPT2-RPT2::loxp (reversed orientation) PSOK1-SOK1-loxp-KANMX-loxp (reversed orientation) leu2::PURA3::tetR-GFP::LEU2 tetOx224-URA3 (tetOs ~13.5kb to right of CEN4) pURA3::ABIx2-V5::TRP1 (between RAD57 and MAF1 at chr IV RIGHT border, transcribed away from CEN4) pURA3::PYLx2-3FLAG::HisMX6 (between PTC1 and MED2 at chr IV LEFT border, transcribed away from CEN4)</i> | 3c            |

**Supplemental Table 2. Plasmids generated in this study.**

| <b>Plasmid</b> | <b>Characteristics</b>                                                                                                     |
|----------------|----------------------------------------------------------------------------------------------------------------------------|
| AMp1298        | <i>pMAF1-MAF2 LoxP-KanMX6-LoxP</i>                                                                                         |
| AMp1302        | <i>pPTC1-PTC1 LoxP-KanMX6-LoxP</i>                                                                                         |
| AMp1332        | <i>pRPT2-RPT2 LoxP-KanMX6-LoxP</i>                                                                                         |
| AMp1360        | <i>pSOK1-SOK1 LoxP-kanMX6-LoxP</i>                                                                                         |
| AMp1411        | <i>pRS306(tetOx224) + 502bp genomic sequence (2901bp right of centromere 3) to integrate tetOs ~3kb to right of CEN3</i>   |
| AMp1412        | <i>pRS306(tetOx224) + 635bp genomic sequence (6453bp right of centromere 3) to integrate tetOs ~7kb to right of CEN3</i>   |
| AMp1413        | <i>pRS306(tetOx224) + 514bp genomic sequence (17546bp right of centromere 3) to integrate tetOs ~18kb to right of CEN3</i> |
| AMp1433        | <i>pRS306(tetOx224) + 676bp genomic sequence (674bp right of centromere 1) to integrate tetOs ~1kb to right of CEN1</i>    |
| AMp1436        | <i>pRS306(tetOx224) + 443bp genomic sequence (7123bp right of centromere 1) to integrate tetOs ~7kb to right of CEN1</i>   |
| AMp1437        | <i>pRS306(tetOx224) + 377bp genomic sequence (3456bp right of centromere 1) to integrate tetOs ~3kb to right of CEN1</i>   |
| AMp1538        | <i>pRS306(tetOx224) + 442bp genomic sequence (8105bp right of centromere 1) to integrate tetOs ~8kb to right of CEN1</i>   |
| AMp1539        | <i>pRS306(tetOx224) + 632bp genomic sequence (23137bp right of centromere 3) to integrate tetOs ~18kb to right of CEN3</i> |
| AMp1562        | <i>pRS306(tetOx224) + 611bp genomic sequence (20810bp right of centromere 3) to integrate tetOs ~21kb to right of CEN3</i> |
| AMp1669        | <i>pRS306(tetOx224) + 505bp genomic sequence (12611bp right of centromere 1) to integrate tetOs ~12kb to right of CEN1</i> |
| AMp1670        | <i>pRS306(tetOx224) + 375bp genomic sequence (11156bp right of centromere 3) to integrate tetOs ~12kb to right of CEN3</i> |

| <b>Plasmid</b> | <b>Characteristics</b>                                                                                                                                              |
|----------------|---------------------------------------------------------------------------------------------------------------------------------------------------------------------|
| AMp1676        | <i>pRS306(tetOx224) + 535bp genomic sequence (3765bp right of centromere 4) to integrate tetOs ~4kb to right of CEN4</i>                                            |
| AMp1677        | <i>pRS306(tetOx224) + 594bp genomic sequence (11426bp right of centromere 4) to integrate tetOs ~11kb to right of CEN4</i>                                          |
| AMp1678        | <i>pRS306(tetOx224) + 560bp genomic sequence (13745bp right of centromere 4) to integrate tetOs ~14kb to right of CEN4 in MAF1-SOK1 reversed orientation strain</i> |
| AMp1776        | <i>pRS306(tetOx224) + 505bp genomic sequence (20660bp right of centromere 4) to integrate tetOs ~21kb to right of CEN4</i>                                          |
| AMp1781        | <i>pURA3::ABIx2-V5::TRP1</i>                                                                                                                                        |
| AMp1792        | <i>pRS306(tetOx224) + 585bp genomic sequence (576bp right of centromere 3) to integrate tetOs ~0,5kb to right of CEN3</i>                                           |
| AMp1796        | <i>pURA3::PYLx2-FLAG::HISMx6</i>                                                                                                                                    |

**Supplemental Table 3. SacCer3 genome coordinates used to generate plots showing ChIP-Seq averages.**

| <b>Chr.</b> | <b>Left arm peak</b> | <b>Left border</b> | <b>CEN</b> | <b>Right border</b> | <b>Right arm peak</b> |
|-------------|----------------------|--------------------|------------|---------------------|-----------------------|
| <b>I</b>    | 134298               | 147806             | 151523     | 160211              | 166415                |
| <b>II</b>   | 212364               | 235228             | 238265     | 244311              | 284156                |
| <b>III</b>  | 92933                | 101301             | 114443     | 114443              | 139263                |
| <b>IV</b>   | 401066               | 440767             | 448766     | 456742              | 477402                |
| <b>V</b>    | 138610               | 145845             | 152046     | 166000              | 189212                |
| <b>VI</b>   | 137306               | 143961             | 148569     | 154425              | 172326                |
| <b>VII</b>  | 469180               | 489446             | 496979     | 504623              | 531467                |
| <b>VIII</b> | 76328                | 100445             | 105645     | 109984              | 119742                |
| <b>IX</b>   | 318507               | 350183             | 355687     | 365766              | 377053                |
| <b>X</b>    | 409512               | 431178             | 436366     | 440892              | 453193                |
| <b>XI</b>   | 411713               | 432938             | 440188     | 446723              | 458573                |
| <b>XII</b>  | 128912               | 134084             | 150888     | 161639              | 168074                |
| <b>XIII</b> | 251386               | 256267             | 268090     | 279763              | 294742                |
| <b>XIV</b>  | 609784               | 616470             | 628817     | 644043              | 648792                |
| <b>XV</b>   | 309510               | 321621             | 326643     | 334818              | 367254                |
| <b>XVI</b>  | 533727               | 550434             | 556015     | 560618              | 577268                |



**Supplemental Table 4. qPCR primer sequences used in this study.**

| Primer pair | Sequence (5'-3')      |      |                       |      |
|-------------|-----------------------|------|-----------------------|------|
|             | Forward primer        | Ref. | Reverse primer        | Ref. |
| p1          | AGATGAAACTCAGGCTACCA  | 782  | TGCAACATCGTTAGTTCTTG  | 783  |
| p2          | ACAAAGGATGATTTGTCAGG  | 910  | CTCTCTCCTTGGCTTGTTA   | 911  |
| p3          | TACAGCAAATGTTGGTGATT  | 4877 | ACCTGCTTGTTCAACTCTCT  | 4978 |
| p4          | TTTAATCCTAGCGTGTGATG  | 5657 | TCCAAAGCATATCTAACCAA  | 5658 |
| p5          | TCTCTCACATGACGAATGAG  | 1321 | GACTTGTA AACCGTGTGTG  | 1322 |
| p6          | ACAACAACAGCAGTGAGAAG  | 4881 | TATTGTTATTGTCGTTCCCA  | 4882 |
| p7          | TTCCAATCCTGGAGATAAC   | 5561 | GAGGTCTAATTCGCCATTAT  | 5562 |
| p8          | GGAGCAATACCAGAACAATG  | 5909 | ATCATCATTCTGCTCCAAC   | 5910 |
| p9          | AAGTTGGAGCAGAAATGATG  | 5911 | TTTGCTGAGATTGACTGAAA  | 5912 |
| p10         | TTTAGTTGTGCATCGCATAAC | 5917 | CGTTACAAGCGGGTAATATC  | 5918 |
| p11         | ATAAGGAACGTGCTGCTACT  | 5549 | CACACAAGTTTGTGCTTT    | 5550 |
| p12         | TGCGGGTGTATACAGAATAG  | 5547 | GCCTCTAGGTTCCCTTTGTTA | 5548 |
| p13         | GGTTTAGATGACAAGGGAGA  | 5545 | GCAAATAGTCCTCTTCCAAC  | 5546 |
| p14         | CCGAGGCTTTCATAGCTTA   | 794  | ACCGGAAGGAAGAATAAGAA  | 795  |
| p15         | AGAAACCACCCATAATTGAG  | 4885 | ACGATAGTCAAATTTCCGTT  | 4886 |
| p16         | TCAAATGAATACGAAGGAGA  | 4891 | AGGGATTCTTCTTGATCTGA  | 4892 |
| p17         | CGATAGTATTGATTGTGGGA  | 1337 | CCAGGAAATGCTTCTAACTT  | 1338 |

**Supplemental Table 5. Hi-C libraries generated in this study.**

| <b>Sample</b>               | <b>Total unique reads (R1/R2)</b> | <b>Valid unique Hi-C pairs</b> |
|-----------------------------|-----------------------------------|--------------------------------|
| WT - Tension                | 36 299 576 / 43 078 602           | 17 937 575                     |
| WT – No tension             | 34 921 366 / 42 352 447           | 17 779 189                     |
| <i>chl4Δ</i> - Tension      | 38 653 664 / 44 991 486           | 19 530 920                     |
| <i>sgo1Δ</i> – No tension   | 37 702 242 / 43 924 423           | 20 318 535                     |
| <i>sgo1-3A</i> – No tension | 45 109 744 / 53 348 344           | 21 068 633                     |
| <i>chl4Δ</i> – No tension   | 64 306 395 / 70 848 109           | 62 060 500                     |
| Reoriented - Tension        | 70 760 639 / 76 584 915           | 76 278 472                     |
